# Supplementary material for: Pan-Cancer Analysis Reveals Genomic and Clinical Characteristics of TRPV Channel-Related Genes
Source: Front Oncol. 2022 Jan 31;12:813100. doi: 10.3389/fonc.2022.813100 (PMC8841404; doi:10.3389/fonc.2022.813100)
Supplement: Supplementary file 7 [file Table_2.xlsx]

## Sheet: Sheet1
Supplementary table 2: Human gene-specific primers used in the qRT-PCR analysis
Gene (accession no.)	Primer sequences(50–30)	Fragment size (bp)
TRPV1 (NM_080706)	Forward: GCCGTTTCATGTTTGTCTA Reverse: GAGCAGGAGGATGTAGGTG	296
TRPV2 (NM_016113)	Forward: TGTAGCCCTGGTGAGCCT Reverse: CCAACGGTCAGCATCACA	423
TRPV3 (NM_145068)	Forward: GCGTGGAGGAGTTGGTAG Reverse: GGCGTCTCACCGAAGTAG	403
TRPV4 (NM_001177431)	Forward: TGGCTTCTCGCATACCGT Reverse: GGCTCTGGCGTTGGCTTA	431
TRPV5 (NM_019841)	Forward: CACCTGCCAACTACGACG Reverse: TTCCGCTCCAGCATCACT	193
TRPV6 (NM_018646)	Forward: GCTTTGCTTCAGCCTTCT Reverse: CAGTGAGTGTCGCCCATC	241
GAPDH (J02642)	Forward: AACAGCGACACCCACTCCTC Reverse: GGAGGGGAGATTCAGTGTGGT	258
TRPV, transient receptor potential vanilloid; GAPDH, glyceraldehyde 3-phosphate dehydrogenase.
